# Supplementary material
Source: publisher figshare collection journal article supplement (https://rs.figshare.com/ndownloader/files/17810924)
Supplement: Supplementary file 1 [file 17810924]

## Sheet: MainExp_Synaesthetes
Synaesthetic colour associations for Japanese Kanji characters: from the perspective of grapheme learning (Asano, Takahashi, Tsushiro, & Yokosawa)
Study 2 Main Experiment: raw data and CIE L*a*b* coordinates
Synaesthetes (N = 11)
		Syn 1											Syn 2											Syn 3											Syn 4											Syn 5
				Pre-learning				Post-learning							Pre-learning				Post-learning							Pre-learning				Post-learning							Pre-learning				Post-learning							Pre-learning
		#	Kanji	Colour	L*	a*	b*	Colour	L*	a*	b*		#	Kanji	Colour	L*	a*	b*	Colour	L*	a*	b*		#	Kanji	Colour	L*	a*	b*	Colour	L*	a*	b*		#	Kanji	Colour	L*	a*	b*	Colour	L*	a*	b*		#	Kanji	Colour	L*
Sound learning task	Test stimuls	1	亜	#FF007E	57.2019	71.6549	36.9255	#FF007E	57.2019	71.6549	36.9255		1	亜	#673939	22.8098	27.0437	23.6652	#6F3434	24.3123	23.1111	36.1601		1	亜	#EB3880	53.4385	65.2829	29.5137	#DF0088	50.8273	62.1175	21.4823		1	亜	#E7435E	52.4312	63.8085	47.112	#FF0030	55.7458	74.2682	79.8941		1	亜	#FF5A00	58.9836
		2	胃	#FCFF00	94.6321	-21.9818	123.029	#FFFC00	93.246	-19.7679	120.745		2	絵	#24D824	70.5734	-81.4039	92.4753	#39C707	64.7796	-72.8168	88.7761		2	佳	#FF75E3	68.2778	50.1863	-0.389998	#FFA4F3	77.0711	28.7729	6.86385		2	架	#BF9B0C	59.9609	8.16619	85.5847	#BF8831	55.1032	21.404	73.8813		2	井	#FFC600	80.0049
		3	絵	#6CE343	75.9032	-67.3599	87.7416	#12C83D	64.5878	-74.2639	76.3344		3	架	#D09644	61.3597	17.4385	75.9532	#D3AD5C	67.7915	5.6709	72.1282		3	租	#55FFE5	88.543	-75.2154	31.3306	#D2FF00	90.294	-40.0919	113.503		3	季	#D68505	58.0465	31.8311	86.3837	#E3AB00	68.6933	15.9073	94.6379		3	忌	#ECEF12	87.8819
		4	区	#8F02A8	37.9856	37.2566	-20.1566	#11069C	21.8865	-0.957031	-40.3905		4	季	#4D9D78	52.4312	-43.4077	33.4227	#55B38C	60.8345	-48.1608	35.0752		4	乃	#A3FFBD	89.7059	-56.577	53.9792	#9BFEEF	90.9257	-55.4666	30.1941		4	否	#F0F6D1	92.9312	-19.0814	46.8182	#C5CDDB	79.0585	-13.8926	18.1124		4	非	#FFDE00	85.2914
		5	未	#FEFF80	94.6576	-19.9967	88.9214	#FFFE86	94.4405	-18.7412	85.7359		5	乃	#FFFFE4	97.5554	-19.1448	48.6683	#F9F5C5	93.2983	-17.2592	57.064		5	非	#FFF600	92.145	-15.6663	120.577	#FFF779	92.4777	-15.2642	90.1617		5	普	#22AF7B	56.9974	-60.2111	35.4188	#229473	47.0662	-47.8959	23.7249		5	未	#FFE610	87.4169
		6	呂	#740E92	30.8689	29.366	-18.9767	#7719A3	33.2881	29.4824	-25.1109		6	未	#E8D3CE	83.3792	-6.05227	37.3129	#FFD1DF	85.9764	5.15957	32.9914		6	未	#FF4F20	57.1436	68.3047	87.4097	#EE2801	51.5876	69.1102	83.2792		6	胃	#290090	20.8392	3.4682	-35.4966	#1C0084	17.8279	-3.61799	-33.128		6	呂	#42DA4D	71.5006
Sound learning task	Control stimuls	1	可	#C60000	42.5212	58.8343	70.7958	#971111	31.6653	46.0019	54.6498		1	可	#ECC85B	77.934	1.2049	85.914	#ECC057	75.8107	5.85384	85.0185		1	可	#FF48B4	60.7993	65.5858	11.7328	#FF3BCF	61.9208	65.736	-1.51294		1	可	#FED0DD	85.4534	7.31163	28.9058	#FFACBC	71.5142	25.4789	30.4538		1	可	#66E727	76.6366
		2	規	#F1FF57	92.8654	-25.6289	102.644	#F6FF00	94.5555	-24.8984	123.497		2	規	#6EEFC0	82.9506	-67.885	42.5074	#61D6B6	74.3366	-59.8526	34.2215		2	規	#FFD11B	81.7294	5.52451	106.544	#FFE32A	86.4099	-4.47483	108.829		2	規	#1A01AD	25.6805	3.43371	-44.9667	#1000AF	25.497	-1.15327	-44.0031		2	規	#FFDD41	85.0932
		3	個	#FF0600	55.4004	72.8505	92.0522	#FB0101	54.3964	73.108	86.4348		3	個	#3F4660	21.7774	-8.65281	-0.693364	#381879	19.0601	4.59293	-21.3431		3	個	#67FFFD	89.9243	-68.4469	20.2197	#52FFF1	88.8326	-73.6977	24.3187		3	個	#77183E	25.1004	34.8836	26.3626	#A23144	35.7231	48.0142	38.3575		3	個	#FFE139	86.1163
		4	佐	#FFA200	70.6151	33.1542	98.1585	#FF9C00	69.3626	36.1238	97.592		4	佐	#6ADABE	76.2714	-58.1883	33.3086	#60CBA9	70.2389	-56.5934	34.6439		4	佐	#F7F96B	92.0471	-20.3669	95.0977	#FFF95F	92.6763	-16.9089	101.041		4	佐	#F7F6A5	92.305	-16.5836	66.4666	#F2F1AC	90.7068	-15.7698	60.5448		4	佐	#FFC600	80.0049
		5	智	#FF5400	58.075	68.0258	91.0078	#FF3000	55.5329	73.2002	87.6926		5	智	#6BB0D7	64.9943	-35.0061	2.51536	#7BB5D3	66.9758	-32.5948	7.74088		5	智	#EEE000	83.9449	-10.9238	108.332	#F8F130	89.5473	-15.6551	110.526		5	智	#8C4B12	32.9191	32.5323	56.2278	#9A1900	32.6106	47.3405	57.1201		5	智	#FDBE14	77.023
		6	斗	#1500E4	35.4886	7.72811	-58.3318	#1802EB	36.8888	2.52167	-58.351		6	斗	#E4DCBE	84.7715	-13.1903	47.2933	#E2DABA	83.898	-13.0246	47.8555		6	斗	#FFC600	80.0049	11.9504	106.829	#F09411	65.1131	34.0908	92.6616		6	斗	#FFF9BA	94.3508	-14.0591	59.0009	#FDFFC6	96.1004	-17.6591	55.4139		6	斗	#DBA000	65.1131
Meaning learning task	Test stimuls	1	机	#FCFF00	94.6321	-21.9818	123.029	#F0FF00	93.7537	-27.3264	121.811		1	机	#7E7A59	43.7705	-3.84763	38.7561	#A09C74	58.2264	-8.34535	45.0384		1	机	#FDDC67	84.9862	-0.870328	86.4466	#F9E400	86.1861	-7.90697	110.371		1	机	#FFFAA8	94.5683	-16.0953	68.8413	#FFF9D0	95.4465	-15.302	51.6896		1	机	#FFC13B	77.987
		2	床	#65C8ED	72.793	-46.4276	0.766628	#65D4FD	77.448	-50.5558	0.0562181		2	床	#DBCF9D	79.6593	-10.3691	56.7621	#C1B17E	67.969	-4.72059	54.5053		2	床	#FFAE00	73.3048	26.0367	99.9856	#00FFCC	86.6919	-81.47	37.1981		2	床	#F7ED82	89.594	-12.533	79.7365	#E7D894	82.8069	-8.41245	61.7095		2	床	#F0CB00	78.5666
		3	坊	#F6FF00	94.5555	-24.8984	123.497	#FFD200	81.8925	5.18257	106.747		3	坊	#C7E1E1	85.3522	-27.0554	31.4096	#B7D5DF	80.7555	-27.482	24.9924		3	坊	#39B2F7	65.9196	-42.2154	-16.6778	#3DFDFF	88.6904	-72.886	16.084		3	坊	#EEE156	84.8329	-10.5473	93.3986	#C9B660	69.4268	-2.98332	68.5652		3	坊	#E3A000	66.1746
		4	放	#7B00BA	36.9445	29.4784	-32.1541	#1804AA	24.9148	1.06831	-43.4448		4	放	#D6CBBE	79.2596	-9.66833	39.3621	#B6A98A	64.9705	-2.43739	43.3765		4	放	#0CB1F5	64.9229	-45.8731	-17.2929	#813FDB	43.2267	27.6456	-40.4617		4	放	#B9E7EE	86.5239	-33.6645	21.9136	#AAE7ED	85.5595	-39.4487	20.7873		4	放	#E79E00	66.2901
		5	念	#F88CFF	72.7138	37.5931	-7.97076	#FF00FC	65.4753	61.691	-15.2343		5	念	#ABAD78	64.4192	-10.8698	52.2128	#C7D094	77.7035	-20.2266	58.0758		5	念	#7DF7DF	86.9723	-62.7129	29.8856	#51FFB7	86.603	-78.8618	47.9208		5	念	#F7B8FE	81.2806	16.3573	5.79108	#FF7CF7	70.9673	46.9827	-7.29452		5	念	#EDB801	73.383
		6	聞	#FDFF55	94.081	-20.522	105.251	#FFFC00	93.246	-19.7679	120.745		6	聞	#504567	24.3762	4.35451	-0.76246	#47316F	20.7624	7.40194	-11.8715		6	聞	#E4FB67	91.0348	-29.3107	93.5012	#D8FF4F	90.953	-37.5147	102.317		6	聞	#B37303	48.4985	25.9621	76.4128	#AD7200	47.2618	23.7735	74.9095		6	聞	#E8B400	71.7649
Meaning learning task	Control stimuls	1	花	#FFB5FB	81.1154	20.9323	7.52794	#FFC2F7	83.6157	14.5992	13.6396		1	花	#FFC0EB	83.0621	14.1707	22.6646	#FF8BEB	72.6145	40.0815	5.83458		1	花	#EAFF00	93.4418	-30.3113	122.014	#F369FF	67.0438	47.4329	-15.5455		1	花	#CAFFDD	93.2547	-39.917	41.0323	#B4F7D7	89.1159	-43.9322	37.5378		1	花	#FFBA00	77.2689
		2	泡	#FFD0FE	87.222	7.1293	15.7372	#FFDDFC	90.1603	0.403355	21.4607		2	泡	#ECFDFF	96.8938	-26.4788	35.3012	#ECFFFF	97.3492	-27.3778	36.0508		2	泡	#5DFFE6	88.6761	-73.2595	31.5711	#99FFF4	91.3879	-56.3147	28.8275		2	泡	#FFDEFB	90.3952	0.154366	21.659	#FFDDFF	90.1557	1.73909	19.2683		2	泡	#FFD93F	84.1165
		3	牙	#FFFD3B	93.6543	-18.9508	112.568	#FFFC1A	93.3462	-18.5982	116.974		3	牙	#E7E6D8	89.0028	-16.404	41.1703	#ECEBDC	90.6383	-17.1724	41.6899		3	牙	#F9880F	64.0799	44.2421	93.4515	#F29A00	66.7713	31.5916	95.0436		3	牙	#FEFFD9	97.1017	-18.6187	49.2959	#EAFF77	92.8127	-28.5054	89.6471		3	牙	#D4A503	65.4753
		4	云	#FBE600	86.8839	-7.92627	111.359	#F1B000	71.8256	18.7123	98.1462		4	云	#C5D4AB	79.3685	-22.8229	48.782	#EAF2BB	91.3337	-22.3755	58.9647		4	云	#FEFFAF	95.5971	-18.9921	66.7012	#FCFFAE	95.5093	-20.3501	69.1154		4	云	#FEFFAD	95.7223	-18.9147	67.8745	#FDFFC3	96.3111	-19.6041	59.3069		4	云	#FFE400	87.519
		5	配	#FFF331	90.8574	-13.5547	111.871	#FFE400	87.519	-5.74919	116.928		5	配	#EEE1C6	87.5044	-11.0034	47.9886	#D6D1A3	79.9484	-13.7714	53.6095		5	配	#FFFD53	93.6889	-18.5131	106.402	#FFF22A	90.4871	-12.7402	113.448		5	配	#FF0000	46.3517	63.5082	70.8424	#FF0030	55.7458	74.2682	79.8941		5	配	#26CC00	65.873
		6	割	#F7770F	60.7463	51.8021	90.2171	#FF9000	67.4716	42.3126	96.2677		6	割	#B3A683	63.6147	-2.46655	44.942	#BEAA85	66.0125	-1.6471	47.3803		6	割	#1000AF	25.497	-1.15327	-44.0031	#2801BC	28.7546	3.83954	-45.9523		6	割	#AA3806	37.0741	47.9807	63.0737	#824E2F	31.7339	26.9456	46.5347		6	割	#2BCB00	65.6551
[truncated: 66 more columns]

## Sheet: MainExp_Non-synaesthetes
Synaesthetic colour associations for Japanese Kanji characters: from the perspective of grapheme learning (Asano, Takahashi, Tsushiro, & Yokosawa)
Study 2 Main Experiment: raw data and CIE L*a*b* coordinates
Non-synaesthetes (N = 11)
		Non-syn 1											Non-syn 2											Non-syn 3											Non-syn 4											Non-syn 5
				Pre-learning				Post-learning							Pre-learning				Post-learning							Pre-learning				Post-learning							Pre-learning				Post-learning							Pre-learning
		#	Kanji	Colour	L*	a*	b*	Colour	L*	a*	b*		#	Kanji	Colour	L*	a*	b*	Colour	L*	a*	b*		#	Kanji	Colour	L*	a*	b*	Colour	L*	a*	b*		#	Kanji	Colour	L*	a*	b*	Colour	L*	a*	b*		#	Kanji	Colour	L*
Sound learning task	Test stimuls	1	亜	#EF2B05	52.2976	70.1338	82.8163	#BD0000	40.8965	58.3587	67.9423		1	亜	#FF0000	46.3517	63.5082	70.8424	#AF004A	38.5684	54.0944	38.5031		1	亜	#FF000C	55.2573	73.8505	87.4621	#00DEFF	78.706	-63.1478	-0.11596		1	亜	#FF0000	46.3517	63.5082	70.8424	#A12797	39.9319	43.6149	-7.28652		1	亜	#007A11	33.9662
		2	胃	#0072FF	49.2771	-16.0281	-48.2529	#F3AB21	70.6081	22.9267	93.9725		2	絵	#80EB8A	81.5383	-61.8742	65.2809	#0C9B12	48.436	-60.6797	70.7372		2	佳	#0018FF	40.2133	3.96554	-64.0174	#F0FF00	93.7537	-27.3264	121.811		2	架	#F68A0A	64.0799	42.9972	92.38	#F09A2A	66.5199	31.9315	89.659		2	井	#3174FD	50.7106
		3	絵	#FFA811	72.2953	30.0239	97.7064	#FF8A00	65.873	46.9502	95.4304		3	架	#836D46	40.6544	9.49601	42.8439	#936D11	42.2311	17.2356	67.5441		3	租	#A4AB6A	62.0235	-13.8452	52.5517	#1A8753	40.6219	-49.4617	33.9133		3	季	#13E14D	72.9314	-83.2736	79.0731	#2985B9	46.7903	-28.853	-16.8154		3	忌	#14142A	2.25823
		4	区	#07E126	73.5001	-84.0887	90.3535	#51F8BB	84.8329	-74.8177	42.0514		4	季	#FFC600	80.0049	11.9504	106.829	#EFE657	86.7806	-13.2754	96.3933		4	乃	#C0FF00	88.6904	-48.1856	110.355	#FF00CC	61.1243	66.5722	-0.357802		4	否	#894BB0	40.6219	29.0519	-21.5033	#654EB1	36.3988	14.5229	-29.3043		4	非	#A84C4C	40.1308
		5	未	#FE9308	67.5612	41.0355	94.1516	#FF1800	55.8064	74.4046	87.0612		5	乃	no colour				#800BB6	37.3333	30.5897	-28.0175		5	非	#784A18	28.1463	24.478	48.4535	#00FFD8	86.9723	-83.5322	32.9304		5	普	#78C4F0	72.3753	-37.295	-3.33286	#41AAB3	58.5274	-43.5948	5.6351		5	未	#443757	17.8279
		6	呂	#6900E0	40.1143	23.2016	-50.7427	#3A0E8C	21.631	16.221	-34.8763		6	未	no colour				no colour					6	未	#8239D5	41.9845	25.8183	-37.7049	#FF9600	67.7915	39.3382	96.0861		6	胃	#2744B0	29.5483	0.0208433	-40.3092	#7A13E4	42.7331	24.9084	-45.9573		6	呂	#FFD800	83.205
Sound learning task	Control stimuls	1	可	#FF0000	46.3517	63.5082	70.8424	#FF0000	46.3517	63.5082	70.8424		1	可	#FF0000	46.3517	63.5082	70.8424	no colour					1	可	#F6FF00	94.5555	-24.8984	123.497	#FFD200	81.8925	5.18257	106.747		1	可	#FF7B33	63.0692	53.5908	84.6645	#F57A27	61.0367	50.5492	86.1392		1	可	#CE2A26	45.2344
		2	規	#FF5400	58.075	68.0258	91.0078	#F05806	55.4412	62.0392	85.2028		2	規	#CED512	78.2689	-19.433	102.469	#FCFF00	94.6321	-21.9818	123.029		2	規	#0600FF	41.0727	-11.4563	-53.094	#0012FF	41.4693	-12.407	-52.8102		2	規	#228A5D	42.2618	-46.9002	29.2052	#46FF27	83.4108	-87.7165	101.083		2	規	#DBD524	80.0501
		3	個	#FBD009	81.5219	5.18944	105.318	#C72B0C	43.3155	59.1157	70.8348		3	個	#957236	43.6684	15.0878	57.4119	#7A0909	24.8494	38.3555	44.6735		3	個	#9CFF00	86.7363	-63.1371	107.695	#A2FF00	87.1193	-61.0642	108.123		3	個	#FFD041	81.4562	8.09307	97.425	#FFA229	70.5318	34.0398	94.1332		3	個	#BBB4B4	70.6982
		4	佐	#0D31CB	31.317	7.63077	-55.2571	#1862EB	43.3894	-6.06636	-51.4907		4	佐	#0048FF	42.4299	-4.62318	-57.4659	#0078FF	50.9204	-21.4671	-43.1658		4	佐	#0048FF	42.4299	-4.62318	-57.4659	#00DEFF	78.706	-63.1478	-0.11596		4	佐	#FFF71D	91.5006	-14.1816	114.162	#FFFD45	93.2329	-17.1494	108.433		4	佐	#41CA61	67.337
		5	智	#FF3030	56.1378	73.4011	77.9962	#FF3535	56.3273	73.0539	75.8106		5	智	no colour				no colour					5	智	#0036FF	41.4378	-6.98691	-56.7735	#0012FF	41.4693	-12.407	-52.8102		5	智	#4668CB	42.0155	-3.76588	-35.081	#6492C1	53.8995	-18.7222	-9.82695		5	智	#AEE700	81.5547
		6	斗	#032BD8	33.3523	4.76175	-57.6256	#1646CF	34.2584	-0.677296	-50.7363		6	斗	#EAFF00	93.4418	-30.3113	122.014	#EAFF00	93.4418	-30.3113	122.014		6	斗	#C1F50B	85.9464	-42.8246	107.891	#00EAFF	82.4432	-68.4791	6.20956		6	斗	#FF9306	67.3595	41.9057	95.2145	#6022BE	34.2151	21.9601	-40.9158		6	斗	#EFE100	85.3066
Meaning learning task	Test stimuls	1	机	#0DC746	64.5397	-72.621	71.083	#16DD4E	72.3953	-81.0087	76.7476		1	机	#897240	42.0155	9.38048	49.2293	#B6B49C	68.5625	-10.2996	37.0078		1	机	#FDE799	88.6381	-6.95842	67.4558	#7C7C7B	44.7307	-0.215637	16.1485		1	机	#C02660	43.0183	57.6629	30.4592	#AEC0C2	72.2753	-18.5416	21.2724		1	机	#947E62	48.0831
		2	床	#2A4BF3	41.2796	4.86553	-59.4112	#0078FF	50.9204	-21.4671	-43.1658		2	床	#8F623D	38.812	22.1079	47.1081	#C1872C	55.3596	22.6244	76.8402		2	床	#D8B809	70.5943	2.19007	95.3866	#081166	10.8131	-6.15284	-26.2689		2	床	#953EB9	42.185	36.5338	-24.3453	#7E5AC6	43.7413	16.0794	-27.5577		2	床	#676647	34.3816
		3	坊	#6700DB	39.1048	23.0697	-49.7316	#FF8400	65.2552	47.8281	100.373		3	坊	no colour				#9F5D17	40.0978	32.0393	65.0869		3	坊	#9000FF	48.7973	30.4384	-49.696	#755302	29.7505	17.0336	51.5856		3	坊	#4DBA4A	60.5337	-58.1729	65.1738	#FF7E00	63.5407	52.2437	93.0767		3	坊	#97824B	49.167
		4	放	#E72A0B	50.6052	67.5491	80.6166	#0C1CB2	25.9779	6.92219	-50.0324		4	放	#15A362	52.1971	-58.7221	42.3911	#5F5E5B	31.4329	1.3356	15.6908		4	放	#00FFC0	86.0214	-84.525	41.9546	#9CFF00	86.7363	-63.1371	107.695		4	放	#2A0F91	21.2187	3.00741	-36.1499	#21BD81	61.9208	-64.959	38.6616		4	放	#43FFF8	89.7338
		5	念	#9C4F11	36.8702	38.5661	61.0258	#FFB400	74.8691	22.6867	101.484		5	念	#B20EE8	50.6872	41.4903	-32.678	#820CC6	39.5468	30.5846	-33.4492		5	念	#5A097F	24.1838	19.8145	-18.8656	#00FFF6	88.2853	-79.271	20.0966		5	念	#7223C3	37.1479	27.8519	-38.6923	#5283A6	46.3918	-20.4437	-6.81821		5	念	#516C00	32.9625
		6	聞	#E3A510	67.5835	19.3813	92.2191	#A309F2	49.7258	40.3483	-44.5637		6	聞	#AFA659	61.9978	-4.6603	62.6071	#CCB168	68.5407	1.26736	64.2251		6	聞	#FFF600	92.145	-15.6663	120.577	#FFDD69	85.2305	-0.0446978	85.7795		6	聞	#72E2E3	80.0952	-53.3267	15.4581	#B4820B	51.8937	19.9258	78.512		6	聞	#2030FF	41.1046
Meaning learning task	Control stimuls	1	花	#FF6C00	61.063	59.8136	90.7033	#FF5400	58.075	68.0258	91.0078		1	花	#FF0600	55.4616	74.5909	88.1096	#00940A	44.8574	-59.8091	66.9872		1	花	#FF00DE	62.533	65.8153	-8.59524	#FF00A8	59.0575	70.1921	14.3539		1	花	#FF42A4	60.1229	68.3795	17.7822	#EB56AA	58.075	58.0305	10.757		1	花	#FB55AF	61.6111
		2	泡	#1C90FD	56.4861	-23.559	-39.4321	#2B8AFF	55.4004	-18.9725	-42.3075		2	泡	#00FFFC	89.0311	-78.3452	20.2825	#EAFFFF	96.9346	-25.6186	30.6574		2	泡	#00F6FF	86.1662	-74.9563	11.9225	#00F0FF	84.2617	-72.1583	8.19386		2	泡	#B68EF3	64.1771	13.3593	-18.5065	#7BEBDC	82.791	-56.7378	23.3849		2	泡	#87FEFF	91.8193
		3	牙	#000E90	19.0601	1.14416	-41.0226	#FF0000	46.3517	63.5082	70.8424		3	牙	#FFFFFF	98.769	-19.9419	37.9008	#DADADA	84.4322	-14.2743	29.7758		3	牙	#FFFC00	93.246	-19.7679	120.745	#FF001E	55.5329	74.0938	86.0214		3	牙	#F26109	56.8212	59.6004	88.2	#FF6000	59.251	64.2762	91.1339		3	牙	#BB0416	40.6219
		4	云	#3600CF	32.9625	10.193	-53.3797	#D800FF	59.0945	54.3855	-35.7628		4	云	no colour				no colour					4	云	#6CFF00	84.6792	-79.5256	104.648	#FFB400	74.8691	22.6867	101.484		4	云	#C722C5	50.9552	54.3324	-16.4274	#3D3FA7	28.9614	5.84141	-36.4321		4	云	no colour
		5	配	#FF6C00	61.063	59.8136	90.7033	#0E1FF4	38.2698	9.1084	-65.3653		5	配	#FF6600	59.9339	61.6237	91.3295	#FFA200	70.6151	33.1542	98.1585		5	配	#00FFC6	86.1712	-83.6442	39.0552	#FFBA00	77.2689	18.6584	104.665		5	配	#3DB4EC	65.5927	-42.794	-12.9081	#22DE95	73.7139	-74.338	45.153		5	配	#49A0CD	58.2642
		6	割	#FF3600	56.2277	73.7097	87.6782	#FF0000	46.3517	63.5082	70.8424		6	割	no colour				no colour					6	割	#FCFF00	94.6321	-21.9818	123.029	#66FF00	84.5713	-81.2871	104.602		6	割	#9156C9	45.9883	24.5019	-25.4431	#FFBE31	77.0531	18.194	98.1076		6	割	#FFFD54	94.6193
[truncated: 66 more columns]

## Sheet: ControlExp (Synaesthetes only)
Synaesthetic colour associations for Japanese Kanji characters: from the perspective of grapheme learning (Asano, Takahashi, Tsushiro, & Yokosawa)
Study 2 Control Experiment: raw data and CIE L*a*b* coordinates
Synaesthetes only (N = 12), Meaning learning task only
		Syn 1											Syn 2											Syn 3											Syn 4											Syn 5
				Pre-learning				Post-learning							Pre-learning				Post-learning							Pre-learning				Post-learning							Pre-learning				Post-learning							Pre-learning
		#	Kanji	Colour	L*	a*	b*	Colour	L*	a*	b*		#	Kanji	Colour	L*	a*	b*	Colour	L*	a*	b*		#	Kanji	Colour	L*	a*	b*	Colour	L*	a*	b*		#	Kanji	Colour	L*	a*	b*	Colour	L*	a*	b*		#	Kanji	Colour	L*
Meaning learning task	Test stimuls	1	机	#33C0EF	73.8946	-50.3776	-6.34161	#05EEEB	87.8963	-73.1552	18.301		1	机	#FACB65	86.4099	6.99052	84.6268	#A95C09	46.711	36.0263	72.5001		1	机	#957E38	51.9614	5.88942	60.4251	#A18852	56.7328	5.82582	51.8441		1	机	#FEFFEE	103.526	-16.2209	37.9094	#FCFCD2	101.677	-16.918	50.5248		1	机	#AD804C	56.1078
		2	床	#FF8A00	65.873	46.9502	95.4304	#FCA325	76.308	31.018	98.0181		2	床	#FFC600	80.0049	11.9504	106.829	#F9EFC8	97.8813	-11.2985	49.3137		2	床	#B2B2B2	73.1676	-9.45241	23.6357	#C8B16A	73.2264	-0.186742	62.6569		2	床	#71342E	28.1996	35.2466	35.0947	#5B2748	22.9818	30.4692	6.8201		2	床	#9F6B52	48.8716
		3	坊	#FFB400	74.8691	22.6867	101.484	#FFC104	83.9449	15.4506	107.588		3	坊	#FFAE00	73.3048	26.0367	99.9856	#FAE086	92.3715	-4.41243	75.7205		3	坊	#DADADA	84.4322	-14.2743	29.7758	#C6C289	78.4092	-10.347	52.5611		3	坊	#5E204A	23.2572	32.9091	5.86512	#5D1133	21.4055	34.7813	20.3808		3	坊	#6BB3EB	71.3986
		4	放	#361FBE	33.0708	11.8717	-49.6283	#0900C8	33.114	4.96093	-55.7812		4	放	#FDE38B	93.4331	-4.31103	73.6213	#FFECC0	97.1423	-6.83226	50.7094		4	放	#94FE0B	91.7163	-66.0872	111.088	#E0E4E4	92.8566	-14.3359	26.3532		4	放	#FFFFF4	103.672	-15.3573	34.7918	#FDFFE5	103.124	-17.1033	42.2327		4	放	#E8F69C	96.1004
		5	念	#921B96	40.1803	45.5729	-15.4512	#8601B2	40.9767	40.1192	-31.1632		5	念	#F57AF1	73.1283	48.6345	-12.9941	#FCC0F4	88.4573	15.6201	12.0867		5	念	#A800FF	55.3187	43.4787	-49.9397	#B35AF2	59.1406	36.985	-36.0089		5	念	#EA5C16	59.3886	60.8524	86.2059	#CA5610	52.1635	52.2414	79.1883		5	念	#716161	39.832
		6	聞	#5D00DC	41.4062	22.2265	-52.814	#5D00C6	38.0391	25.2126	-47.3775		6	聞	nocolor				#C000FF	55.5938	47.5742	-40.7813		6	聞	#A7894F	57.6746	8.27202	55.0599	#96FE69	91.9534	-63.5318	87.3516		6	聞	#FCFDA0	100.577	-18.9512	75.1526	#FEFF92	100.959	-18.7584	80.5337		6	聞	#0A8724	45.7299
Meaning learning task	Control stimuls	1	花	#FCAEFF	85.139	24.9204	0.962266	#FFBBFB	87.959	20.5085	6.32229		1	花	#FCFCD4	101.752	-16.9087	49.5041	#FA99D7	78.5142	34.1185	12.1862		1	花	#FEA3DB	81.1154	31.7814	12.6992	#FA34E5	67.0664	66.4394	-14.5871		1	花	#FEFFFC	104.07	-15.5801	31.5931	#FEFFEE	103.526	-16.2209	37.9094		1	花	#F99D9D	76.673
		2	泡	#79EAD9	87.1634	-57.3936	25.1591	#8BFFEB	94.7468	-59.7013	27.5296		2	泡	#FAF3BB	98.5711	-13.9895	58.6718	#D9F6F8	97.5957	-25.4577	23.6636		2	泡	#BDFFFD	98.3686	-40.5923	22.3736	#CBFFFC	99.1705	-35.1921	24.0211		2	泡	#48387D	26.9333	14.5555	-21.4218	#2C216A	17.599	10.2952	-25.1711		2	泡	#B9F4DC	93.7839
		3	牙	#6CBDD4	72.9906	-38.9687	5.02628	#57D9F0	82.1254	-54.7378	6.22776		3	牙	#FAF9D4	100.883	-16.3867	48.9551	#FBF9D7	101.073	-15.8827	47.6369		3	牙	#F8EDD1	97.7568	-11.0172	45.4553	#ECECEC	96.1873	-12.9694	27.2278		3	牙	#613A3A	26.125	25.7256	22.6092	#48223D	19.2077	33.662	-8.78375		3	牙	#939393	60.078
		4	云	#EDC128	81.2256	7.74506	100.58	#FFD928	89.9707	1.64949	109.492		4	云	#FFF089	96.853	-10.3883	78.993	#F9D892	90.5008	-0.142147	66.7066		4	云	#B39D60	65.0181	2.13535	55.538	#DBD765	85.509	-13.3165	82.1799		4	云	#591937	22.1743	39.637	1.5157	#4E0D2E	18.8643	36.8731	3.79141		4	云	#120000	3.36928
		5	配	#93F5FB	92.9969	-50.7527	16.1794	#AAFCFF	96.3111	-45.7897	18.6675		5	配	#F1E6C9	93.9735	-9.84187	42.6152	#FF00AE	60.069	69.7166	13.1448		5	配	#2CBA1D	65.1842	-67.433	83.3701	#22BC16	65.8264	-69.7093	84.8035		5	配	#FEFFE6	103.234	-16.5732	41.6306	#FEFFE8	103.307	-16.5066	40.7163		5	配	#F1FD2C	97.801
		6	割	#0F03AA	27.2999	3.88002	-48.2395	#0D05A4	26.0662	3.39108	-46.8386		6	割	#9938FD	53.8355	36.1061	-50.8385	#6A1BCB	40.2462	28.9831	-46.4308		6	割	#DDDBDB	89.8779	-11.0898	26.4659	#DFE3E3	92.3626	-14.2263	26.2534		6	割	#F9792B	67.1568	52.159	87.684	#F2912A	70.4274	37.712	90.3085		6	割	#24BA36	65.1131
																								Note.																						Note.
																								机 and 放 were removed from the analyses because Syn 3 already knew their Chinese meaning at the beginning of the experiment.																						机 and 床 were removed from the analyses because Syn 5 already knew their Chinese meaning at the beginning of the experiment.
[truncated: 76 more columns]
